# Supplementary material
Source: HighWire-hosted journal article supplement (https://cmaj.ca/highwire/filestream/58994/field_highwire_adjunct_files/0/fracture-devereaux-1-at.pdf)
Supplement: fracture-devereaux-1-at.pdf [file fracture-devereaux-1-at.pdf]

**Appendix 1 (as supplied by the authors): Conditions likely to benefit from medical optimization prior to surgery**

1. acute myocardial infarction associated with a mechanical complication (i.e., acute papillary muscle rupture, ventricular septal defect) or ST-elevation myocardial infarction;
2. cardiac arrest;
3. cardiogenic shock, defined by systemic hypotension and symptoms of organ hypoperfusion (oliguria, change in mental status, cold extremities) that the treating physician believes is due to a low cardiac output state (measurement of cardiac index or pulmonary capillary wedge pressure is not required) or requiring inotropic drugs;
4. frank pulmonary edema that cannot be corrected within 2 hours (i.e., after 2 hours the patient cannot maintain oxygen saturation  $\geq 90\%$  in supine position with nasal oxygen or 28% oxygen by mask);
5. respiratory failure requiring mechanical ventilation;
6. known pulmonary artery hypertension ( $> 80$  mm Hg);
7. home oxygen therapy with concomitant clopidogrel (because regional anaesthesia is not possible);
8. presumptive bacteremia on the basis of fever  $\geq 39^\circ$  Celsius or two of the following: a) Temperature  $> 38^\circ$  Celsius or  $< 35^\circ$  Celsius; b) white blood cell count (WBC)  $> 12$  or  $< 4$  or  $> 10\%$  immature bands; c) rigors; and d) hypotension with evidence of organ dysfunction;
9. hereditary or acquired coagulopathy that cannot be corrected within 2 hours to a INR  $< 1.5$ ;
10. thrombocytopenia (platelets  $< 75 \times 10^9/L$ ) of unknown origin that cannot be corrected within 2 hours or in case of known chronic thrombocytopenia platelets  $< 50 \times 10^9/L$ ;

11. deep venous thrombosis in the last month requiring implantation of vena-cava filter before surgery;
12. acute stroke within 7 days of fracture;
13. subarachnoid hemorrhage within 1 month of fracture;
14. impaired consciousness of unknown origin (Glasgow coma scale <12);
15. fractures acquired during a seizure in patients without a known history of epilepsy;
16. hyponatremia (<120 mmol/L), hypernatremia (>155 mmol/L), OR hyponatremia (<125 mmol/L) or hypernatremia (>150 mmol/L) associated with neurological symptoms (e.g., impaired consciousness to coma, seizures);
17. hyperkalemia >5.5 mmol/L with QRS-complex >120 milliseconds (ms) in patients without known previous QRS-complex >120 ms or hypokalemia <2.8 mmol/L not amenable to correction within 2 hours;
18. pH <7.15 not amenable to correction within 2 hours; or
19. indication for acute dialysis.
